# Supplementary material
Source: PubMed Central journal article supplement (PMC2964108)

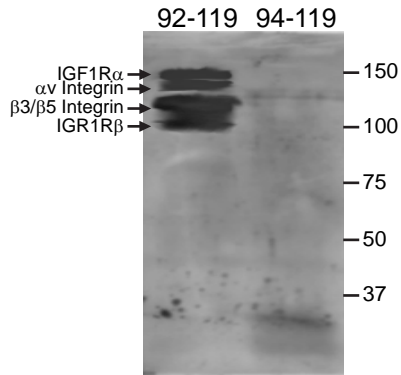

IP: anti-biotin agarose (mAb BN-34)  
IB: StreptavidinAP

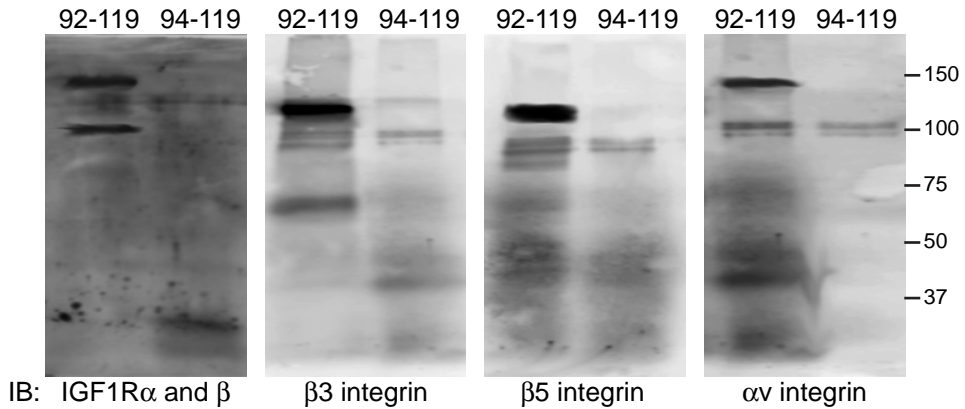

Supplement: supp_123_21_3796__2.pdf [file supp_123_21_3796__2.pdf]
